# Supplementary material for: Positive/negative electrocaloric effect induced by defect dipoles in PZT ferroelectric bilayer thin films
Source: Royal Society of Chemistry journal article supplement (doi:10.1039/c6ra14776c), 2016-01-01
Supplement: c6ra14776c1.pdf [file c6ra14776c1.pdf]

## Supporting Information

### Positive/Negative Electrocaloric Effect Induced by Defect Dipoles in PZT Ferroelectric Bilayer Thin Films

Tiandong Zhang,<sup>a</sup> Weili Li,<sup>\*ab</sup> Yafei Hou,<sup>a</sup> Yang Yu,<sup>a</sup> Wenping Cao,<sup>a</sup> Yu Feng,<sup>a</sup>  
Weidong Fei,<sup>\*ac</sup>

In this work, the total thickness  $l$  of the  $\text{PZ}_{0.52}\text{T}_{0.48}/\text{PZ}_{0.8}\text{T}_{0.2}$  bilayer thin films is 350 nm, the thickness of the  $\text{PZ}_{0.52}\text{T}_{0.48}$  single layer films and the  $\text{PZ}_{0.8}\text{T}_{0.2}$  bilayer thin films is about 175 nm. The dielectric constant for the  $\text{PZ}_{0.8}\text{T}_{0.2}$  and  $\text{PZ}_{0.52}\text{T}_{0.48}$  single layer films is 1068 and 2038, respectively (at 1 kHz). The electric field amplification can be realized in the  $\text{PZ}_{0.8}\text{T}_{0.2}$  layer by the uneven dielectric constant of individual layer.<sup>1</sup>

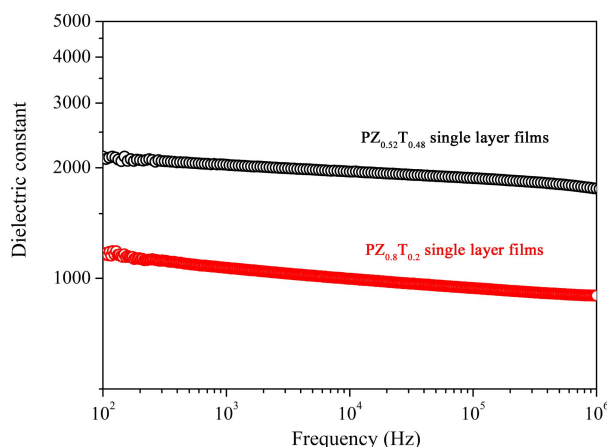

**Fig. S1** The dielectric constant dependence of frequency of the  $\text{PZ}_{0.8}\text{T}_{0.2}$  single layer and  $\text{PZ}_{0.52}\text{T}_{0.48}$  single layer.

The  $P(E)$  loops and  $CV$  curves of  $\text{PZ}_{0.8}\text{T}_{0.2}$  layer (thickness=175 nm) and  $\text{PZ}_{0.52}\text{T}_{0.48}$  layer (thickness=175 nm) are given in Fig. S2. It is consistent well with the previous reported, the double  $PE$  loops and the twin-peaks  $CV$  curves induced by defect dipoles are observed in  $\text{PbZr}_{0.8}\text{Ti}_{0.2}\text{O}_3$  single layer films.<sup>2</sup>

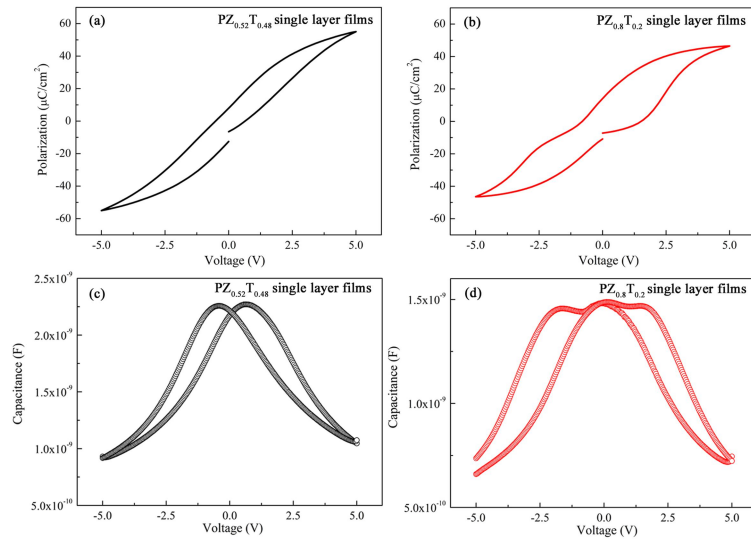

**Fig. S2**  $P(E)$  loops and  $CV$  curves of the  $PZ_{0.8}T_{0.2}$  single layer and  $PZ_{0.52}T_{0.48}$  single layer thin film.

(a)  $P(E)$  loops of  $PZ_{0.52}T_{0.48}$  single layer films, (b)  $P(E)$  loops of  $PZ_{0.8}T_{0.2}$  single layer films, (c)  $CV$  curves of  $PZ_{0.52}T_{0.48}$  single layer films, (d)  $CV$  curves of  $PZ_{0.8}T_{0.2}$  single layer films.

In order to further support the existence of the oxygen vacancy, a XPS survey are given in **Fig. S3**.

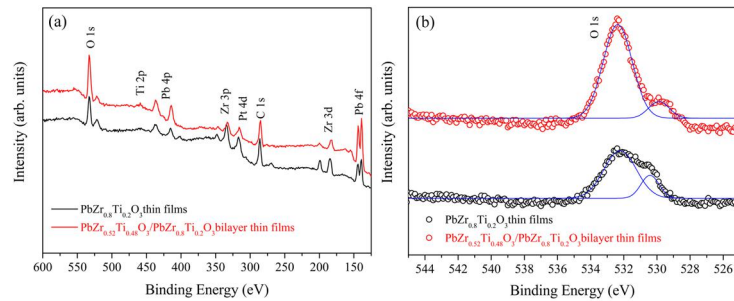

**Fig. S3** Fig. 1(a) XPS survey spectrum of the  $PZ_{0.8}T_{0.2}$  individual films and  $PZ_{0.52}T_{0.48}/PZ_{0.8}T_{0.2}$  bilayer films, (b) XPS

spectrum of  $O1s$  for  $PZ_{0.8}T_{0.2}$  individual films and  $PZ_{0.52}T_{0.48}/PZ_{0.8}T_{0.2}$  bilayer films.

## REFERENCES

- 1 T. D. Zhang, W. L. Li, W. P. Cao, Y. F. Hou, Y. Yu, W. D. Fei, *Appl. Phys. Lett.*, 2016, **108**, 162902.
- 2 Y. T. Pu, J. L. Zhu, X. H. Zhu, Y. S. Luo, M. S. Wang, X. H. Li, J. Liu, J. G. Zhu, D. Q. Xiao, *J. Appl. Phys.*, 2011, **109**, 044102.
